# Supplementary material
Source: Research Square preprint supplement (doi:10.21203/rs.3.rs-9475086/v1)
Supplement: Supplementary file 1 [file 7fbf8bd095b69166caa66b94.xlsx]

## Sheet: Tabela_1
	Table 1. Demographic
		Young		Postmenopause		p-value
	Number	12		5
	Age (Years)	24±1		62±2		<0.01
	Weight (kg)	64±2		67±3		0.44
	Height (cm)	163±2		157±2		0.03
	BMI (kg/m2)	24±1		26±1		0.10
	MVC (N)	257±21		180±24		0.79
	Maximal voluntary contraction (MVC). T-test significance p<0.05.

## Sheet: Tabela_2
	Tabel 2 - Cardiovascular variables
			Control					b-blockade
			Rest	Handgrip	Metaboreflex	Recovery		Rest	Handgrip	Metaboreflex	Recovery		p-value
	Heart rate (bpm)	Young	69±2	93±3⁎	70±2⁑	67±2		58±2‡	74±2⁎‡	59±2⁑‡	58±2‡		Time: p<0.01 Group: p=0.01 Time*Group: p<0.01 Condition: p<0.01 Condition*Time*Group: p=0.02
		Postmenopausal	62±4	69±4†	64±5	60±4		52±3‡	61±3⁎†‡	55±5‡	52±3‡
	Sistolic blood pressure (mmHg)	Young	106±2	150±4⁎	132±3⁎⁑	114±2		102±2	143±4⁎	125±4⁎⁑	105±4		Time: p<0.01 Group: p<0.01
		Postmenopausal	123±9†	172±20⁎	162±21⁎†	134±15†		121±7†	182±12⁎†	165±9⁎⁑†	136±7†
	Diastolic blood pressure (mmHg)	Young	66±2	102±3⁎	87±3⁎⁑	70±2		52±2‡	87±3⁎‡	69±3⁎⁑‡	54±3‡		Time: p<0.01 Group: p<0.01 Time*Group: p<0.01 Condition*Group: p=0.01
		Postmenopausal	75±4†	98±6⁎	92±6⁎	79±5		74±3†	108±3⁎†	94±3⁎†	82±2†
	Stroke volume (ml)	Young	82±5	88±6	100±6⁎	91±5⁎		80±4	84±5	97±6⁎	86±5		Time: p<0.01 Time*Group: p=0.03 Condition: p=0.01
		Postmenopausal	96±11	84±15	92±16	99±15		87±13	66±9	78±11	82±13
	Cardiac output (l/min)	Young	5.8±0.3	8.3±0.5⁎	7.1±0.4⁎⁑	6.2±0.3		4.8±0.2‡	6.3±0.3⁎‡	5.7±0.3⁎⁑‡	5.0±0.2‡		Time: p<0.01 Time*Group: p<0.01 Condition: p<0.01
		Postmenopausal	6.0±0.6	6.0±1.1†	6.0±0.6	6.0±0.7		4.7±0.6‡	4.2±0.4†‡	4.3±0.4†‡	4.5±0.4‡
	Only significant p-values are shown, three way ANOVA, ⁎ p<0.05 vs. rest; ⁑ p<0.05 vs. handgrip; † p<0.05 vs. young and ‡ p<0.05 vs. control.
